# Supplementary material
Source: PubMed Central journal article supplement (PMC7335355)

**A**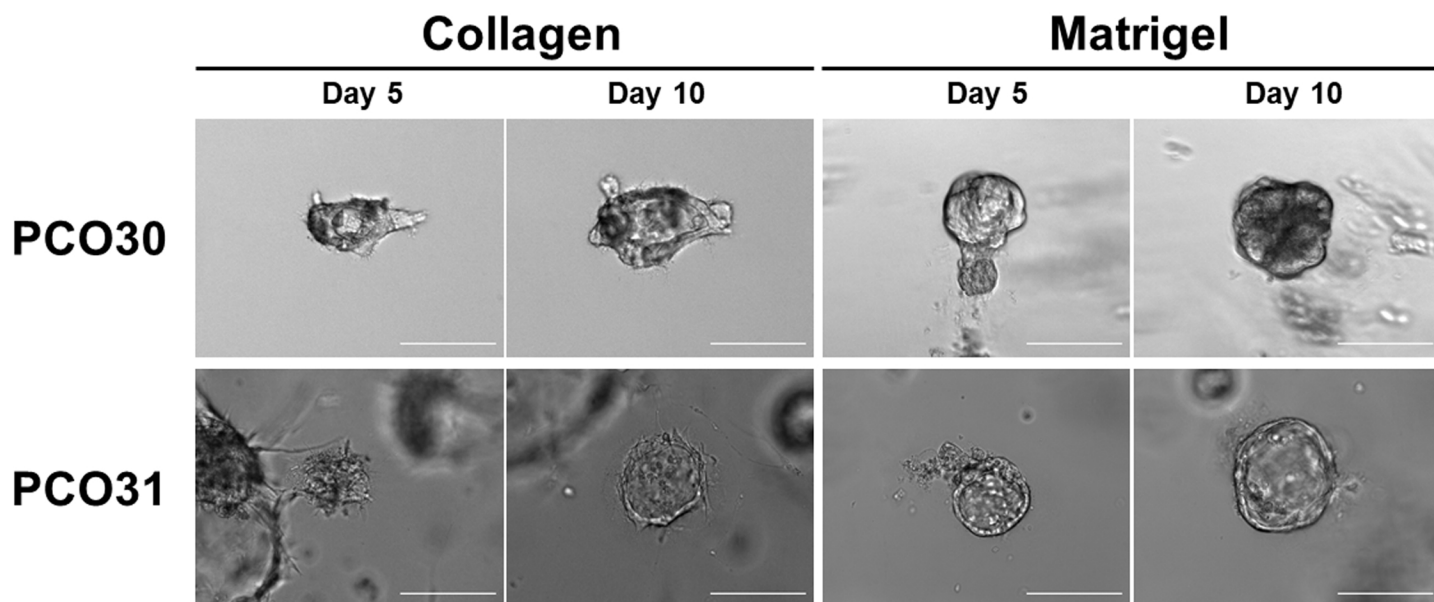**B**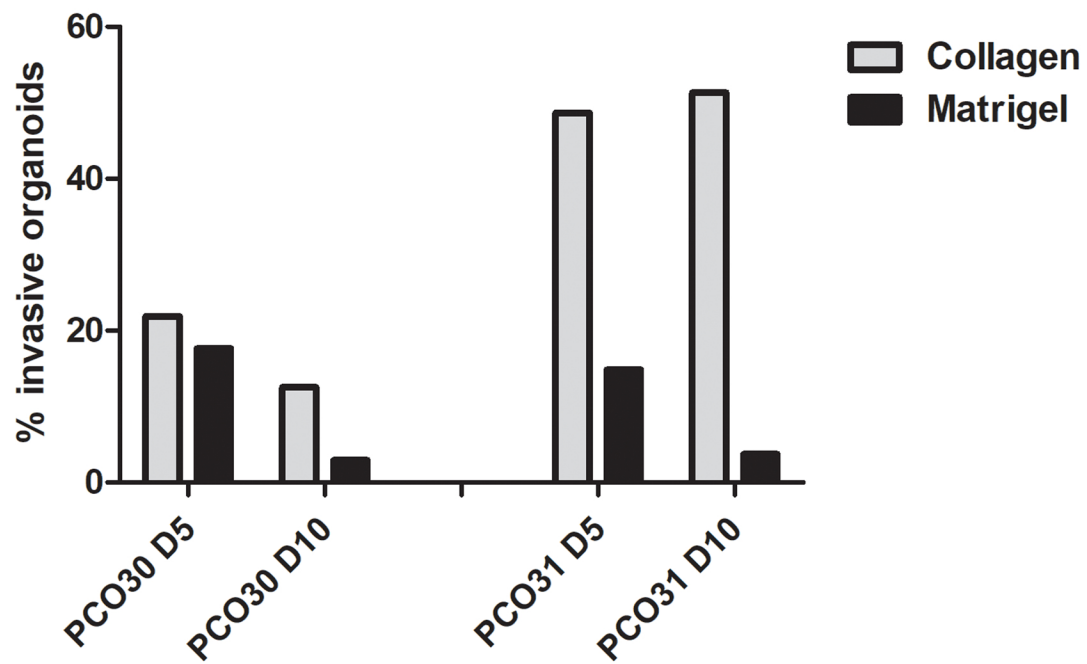

Supplement: NIHMS1592760-supplement-10.pdf [file NIHMS1592760-supplement-10.pdf]

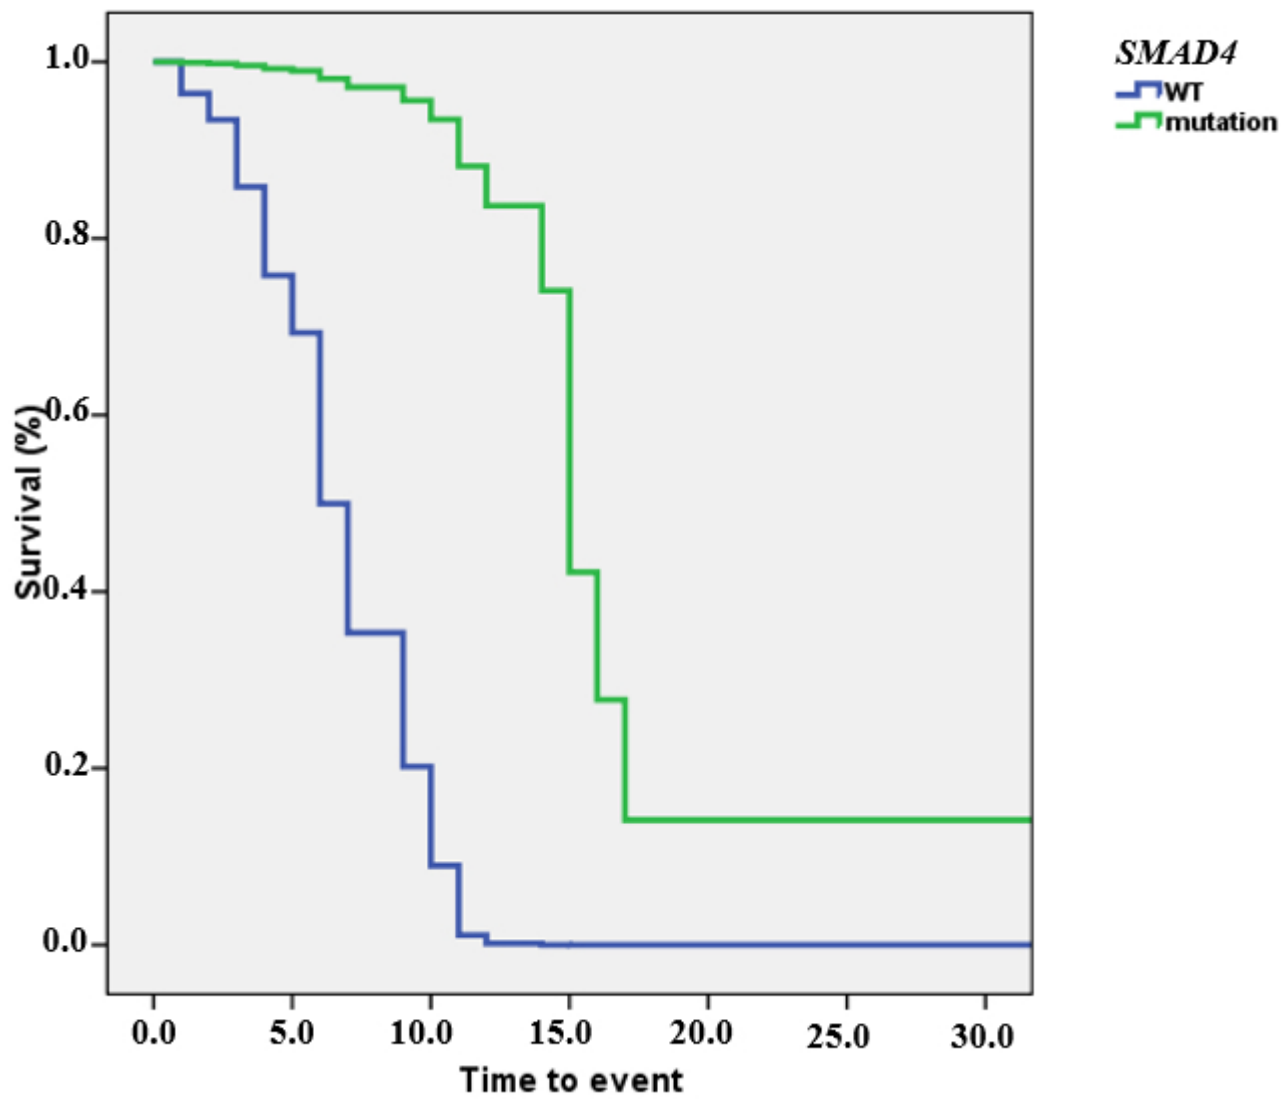

Supplement: NIHMS1592760-supplement-11.pdf [file NIHMS1592760-supplement-11.pdf]

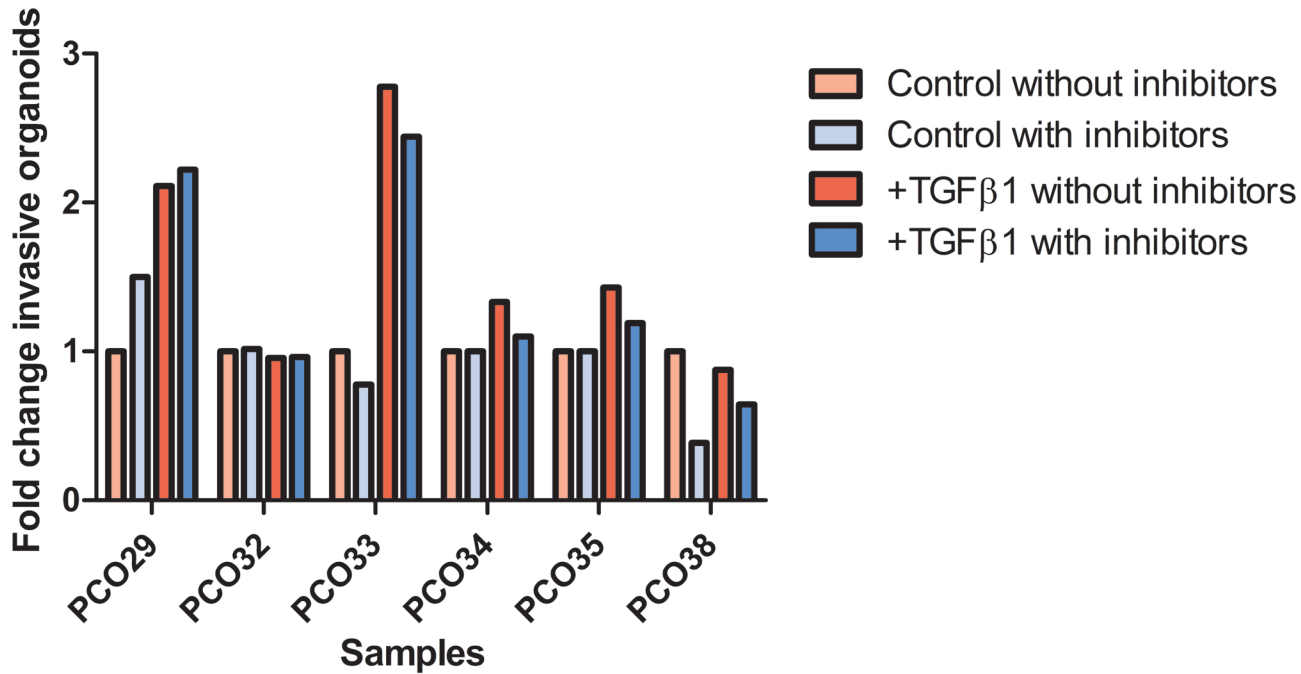

Supplement: NIHMS1592760-supplement-12.pdf [file NIHMS1592760-supplement-12.pdf]

**A**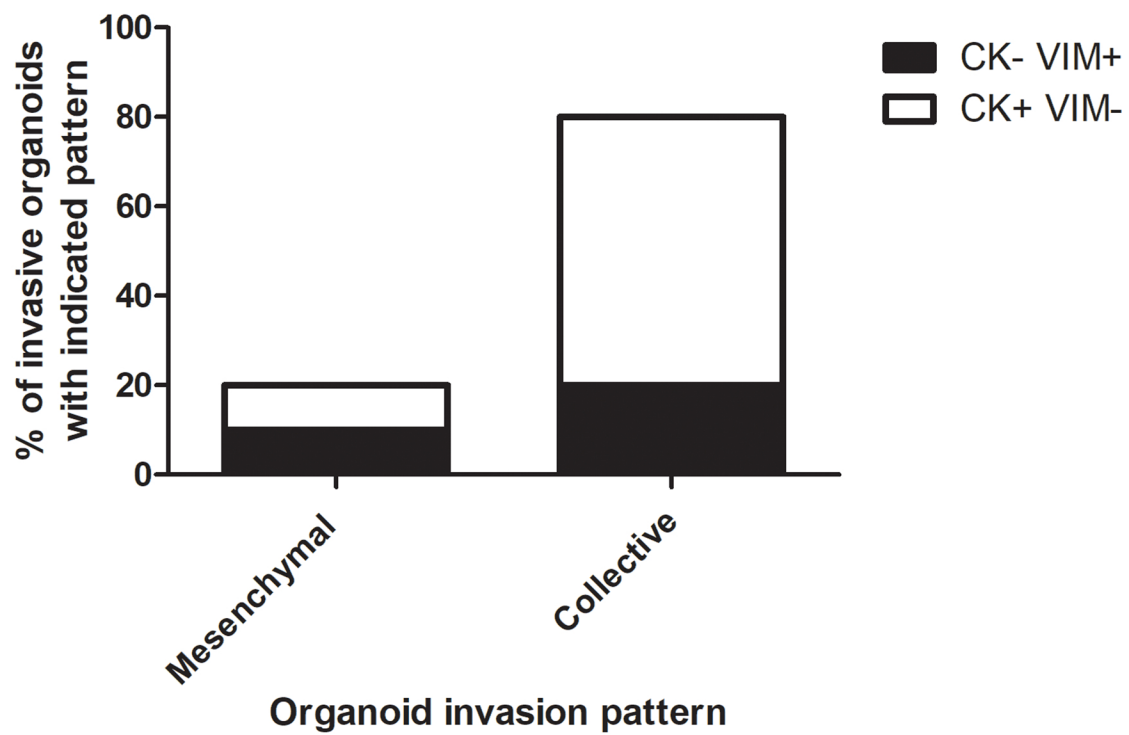**B**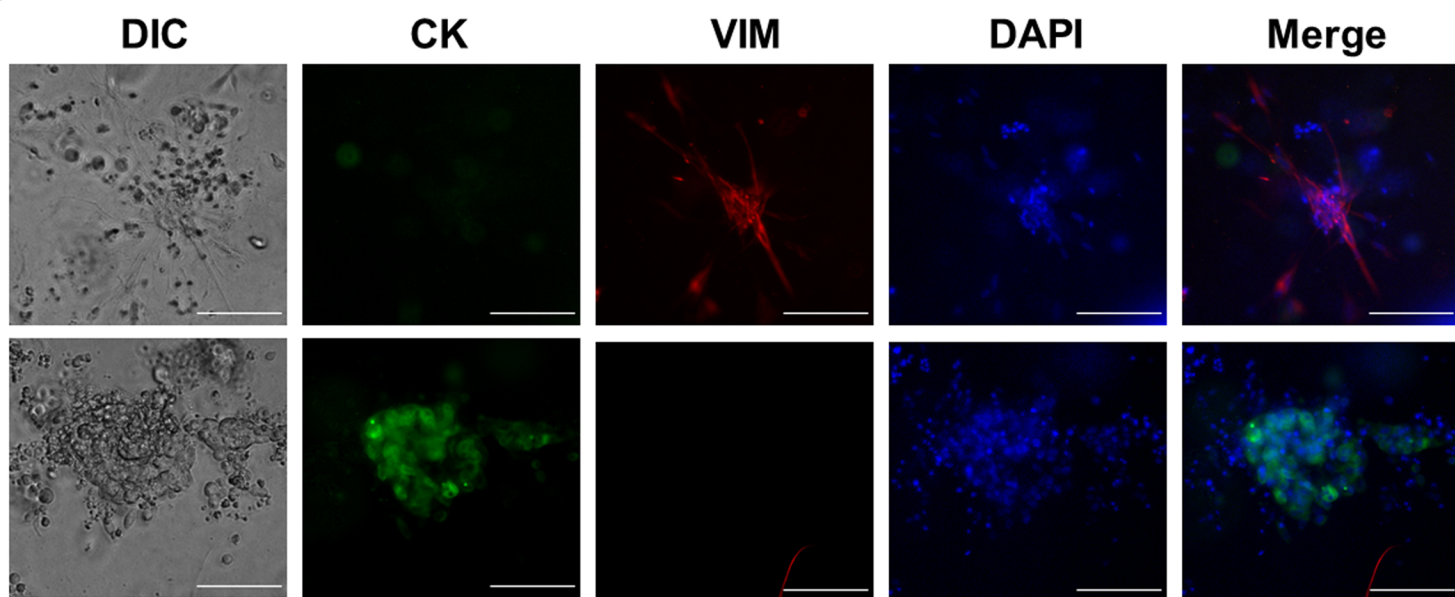

Supplement: NIHMS1592760-supplement-9.pdf [file NIHMS1592760-supplement-9.pdf]
